# Supplementary material
Source: publisher site journal article supplement (http://scielo.br/pdf/rmat/v22s1/1517-7076-rmat-22-suppl-e11908.pdf)
Supplement: Supplementary file 1 [file 1517-7076-rmat-22-suppl-e11908.pdf]

## Produção e caracterização de filmes finos transparentes e condutores de óxido de grafeno reduzido

### Production and characterization of reduced graphene oxide films as transparent and conductive contacts

Andreza Menezes Lima<sup>1</sup>, Géssica Seara Faria<sup>1</sup>, Stefania Nardecchia<sup>2</sup>,  
Leila Rosa de Oliveira Cruz<sup>1</sup>, Mariana de Mattos Vieira Mello Souza<sup>3</sup>, Wagner Anacleto Pinheiro<sup>1</sup>

<sup>1</sup> Instituto Militar de Engenharia – IME – SE4 – Praça General Tibúrcio, 80, Urca, Rio de Janeiro, RJ  
e-mail: andrezamenezeslima@gmail.com

<sup>2</sup> Pontifícia Universidade Católica do Rio de Janeiro – PUC-Rio - Rua Marquês de São Vicente, 225, Gávea, Rio de Janeiro, RJ

<sup>3</sup> Universidade Federal do Rio de Janeiro, Escola de Química, Centro de Tecnologia, Bloco E, sala 206 – Cidade Universitária, Rio de Janeiro, RJ  
e-mail: gessica.seara.faria@gmail.com; stefanianardecchia@yahoo.it; leilacruz@ime.eb.br; mmattos@eq.ufrj.br; anacleto@ime.eb.br.

---

#### RESUMO

Dispersões de óxido de grafeno (GO) e de óxido de grafeno reduzido (rGO) foram produzidas, respectivamente, por via química através do método de Hummers modificado e por redução do GO com adição de polímero PSS (poli (4-estirenosulfonato de sódio)) e ácido ascórbico. Amostras de GO e rGO/PSS foram caracterizadas pelas seguintes técnicas: microscopia óptica, microscopia eletrônica de varredura (MEV), espectroscopia Raman e espectroscopia de fotoelétrons excitados por raios X (XPS). A partir das dispersões foram depositados filmes finos em substratos de vidro pelos seguintes métodos: *spray*, *dip coating* e *spin coating*. Os filmes produzidos foram, em seguida, tratados termicamente para melhoria da aderência nos substratos e, especificamente para os filmes de GO, para redução, de modo a formar o óxido de grafeno reduzido termicamente (trGO). Os filmes foram caracterizados quanto a espessura, morfologia, transmitância e resistência de folha. Por meio das caracterizações realizadas a partir das dispersões foi possível observar folhas de grafeno pela microscopia óptica, indicando o sucesso do método de produção empregado; por meio do XPS, determinou-se a composição das amostras de GO e rGO e confirmou-se que a redução com ácido ascórbico foi efetiva; as transmitâncias obtidas mostraram-se dentro da faixa indicada para aplicação e as resistividades de algumas amostras, alcançaram valores próximos a de materiais tradicionalmente aplicados como filmes transparentes e condutores.

**Palavras-chave:** óxido de grafeno reduzido; filmes transparentes e condutores; métodos de deposição.

---

#### ABSTRACT

Dispersions of graphene oxide (GO) and reduced graphene oxide (rGO) were respectively chemically produced by the modified Hummers method and by reducing GO with the addition of PSS polymer (poly (4-styrenesulfonate sodium)) and ascorbic acid. Samples of GO and rGO/PSS were characterized by the following techniques: optical microscopy, scanning electron microscopy (SEM), Raman spectroscopy and X-ray photoelectron spectroscopy (XPS). From the dispersions thin films were deposited on glass substrates by the following methods: *spray*, *dip coating* and *spin coating*. The films produced were then thermally treated to improve adhesion on substrates and, specifically for GO films, for reduction, so as to form thermally reduced graphene oxide (trGO). The films were characterized as thickness, morphology, transmittance and sheet resistance. By means of the characterizations made from the dispersions it was possible to observe graphene sheets by optical microscopy, indicating the success of the production method employed; by means of the XPS, the composition of the samples of GO and rGO was determined and confirmed that the reduction with ascorbic acid was effective; the obtained transmittances were within the range indicated for application and

the resistivities of some samples reached values close to that of materials traditionally applied as transparent films and conductors.

**Keywords:** reduced graphene oxide; transparent and conductive films; methods of deposition.

## 1. INTRODUÇÃO

Desde que Geim e Novoselov foram contemplados com o Nobel de Física em 2010 [1], com a demonstração de que grafeno com poucas camadas poderia ser produzido por esfoliação mecânica de grafite e a caracterização do material obtido, uma significant parcela da comunidade científica passou a estudar as propriedades e aplicações deste material nas mais diversas áreas. Grafeno está no centro das grandes pesquisas devido a sua produção simples e propriedades únicas como alta mobilidade, transparência óptica, flexibilidade, não toxicidade e estabilidade ambiental [2, 3]. Um dos derivados do grafeno é o óxido de grafeno (*graphene oxide* - GO), que pode ser obtido pelo método de Hummers modificado [1]. No GO, basicamente, há a presença de grupos funcionais (como hidroxilas e epóxis) que decoram o plano basal do grafeno.

É possível reduzir o GO obtendo-se o óxido de grafeno reduzido (*reduced graphene oxide* - rGO), por diversos métodos físicos, como tratamentos térmicos, ou químicos, por meio da adição de hidrazina ou ácido ascórbico [2]. Assim ocorre a eliminação dos grupos funcionais e a restauração das ligações  $\pi$ , resultando em uma tendência à agregação das folhas de óxido de grafeno reduzido em presença de água como dispersante.

Para evitar essa agregação, pode-se utilizar um polímero surfactante, de modo a envolver as folhas de grafeno, mantendo um caráter hidrofílico.

Levando em conta as propriedades supracitadas, grafeno torna-se um bom candidato em inúmeras aplicabilidades, dentre elas: supercapacitores, sensores, nanoeletrônica, células solares, compósitos, fotocatalise, fotoredução, transistores, eletrodos transparentes e condutores, dentre outras.

Os filmes transparentes e condutores são aplicados usualmente em dispositivos fotoelétricos, dispositivos de comunicação, displays e outras tecnologias. Desta forma, este material tem sido compreendido como uma alternativa ao (óxido de índio e estanho) ITO, aplicado como contato transparente em diversos dispositivos fotoelétricos. Apesar de dominante no mercado, o ITO é um material caro, raro e instável na presença de ácidos ou bases, tornando seu emprego desfavorável [4]. Este estudo tem como objetivo a produção e caracterização de filmes obtidos a partir de dispersões de óxido de grafeno e óxido de grafeno reduzido para aplicação como contatos transparentes e condutores.

## 2. MATERIAIS E MÉTODOS

### 2.1 Materiais

Na consecução desta pesquisa, os seguintes materiais foram empregados: grafite Sigma Aldrich 332461 +100 mesh; ácido sulfúrico P.A. 98% ( $H_2SO_4$ ) B Herzog; nitrato de sódio P.A. ( $NaNO_3$ ) Vetec; permanganato de potássio 99,3% ( $KMnO_4$ ) Vetec; peróxido de hidrogênio P.A. 32% ( $H_2O_2$ ) Vetec; água deionizada; hidróxido de amônio P.A. 29% ( $NH_4OH$ ) Vetec; ácido ascórbico (AA) P.A. 99% ( $C_6H_8O_6$ ) Synth; PSS (poli (4-stirenosulfonato de sódio)) 30% Aldrich.

### 2.2 Métodos

#### 2.2.1 Produção das dispersões de GO e rGO

O procedimento empregado para produção de GO foi o método de Hummers modificado [1]. Foram lavados 4,5 g de grafite com água deionizada e o sobrenadante descartado, e o material foi deixado na estufa a 80 °C para secagem por 7 horas. Para a etapa de intercalação, ao grafite seco (2,50 g) foram adicionados 1,90 g de  $NaNO_3$  e 87,17 mL de  $H_2SO_4$ . A mistura foi mantida sob agitação magnética durante 2 horas. Em seguida, para a etapa de oxidação, foram adicionados 11,26 g de  $KMnO_4$ , mantendo-se durante 7 dias.

A etapa de esfoliação começou com a adição sob agitação magnética da solução de  $H_2SO_4$  a 5%, com agitação durante 3 horas. Para término da etapa de oxidação foi realizada a adição de 7,50 g de solução de  $H_2O_2$  a 30 volumes, por 2 horas. Após esse período, continuou-se a etapa de esfoliação com a adição de solução de  $H_2SO_4$  a 3% e  $H_2O_2$  a 0,5%, com agitação mantida por cerca de 12 horas.

Em seguida, iniciaram-se as etapas de lavagem/centrifugação, utilizando-se uma centrífuga Excelsa II - modelo 206 BL, fabricante FANEM, com objetivo de lixiviar impurezas e reagentes excedentes. A primeira centrifugação foi realizada a 5000 rpm durante 30 minutos; a solução sobrenadante, com impurezas e reagentes dissolvidos, foi descartada, enquanto a parte sedimentada, constituída de GO na forma de um líquido vis-

coso de cor marrom, foi mantida nos tubos de centrifugação. Mais 11 centrifugações foram realizadas com adição de solução de  $H_2SO_4$  a 3% e  $H_2O_2$  a 0,5% aos tubos, sempre se descartando o sobrenadante após cada centrifugação. Posteriormente, com adição de apenas água deionizada, foram realizadas mais cinco etapas de lavagem/centrifugação e descarte do sobrenadante, com o objetivo de eliminar os últimos vestígios de impurezas dissolvidas. O GO obtido apresentou pH de 3,6 e concentração de 2,3 mg/mL. Por fim, foi procedida a filtração a vácuo, com o objetivo de eliminar partículas de grafite não oxidado.

Para redução, foi adotado procedimento de acordo com FERNÁNDEZ-MERINO *et al.* (2010) [2]. A redução foi realizada adicionando-se em um béquer 40 mL da dispersão de GO e 5,3 mL do polímero PSS. A mistura foi mantida sob agitação magnética por 15 minutos. Em seguida, 0,56 g de ácido ascórbico (AA) foram adicionados e a agitação perdurou por mais 10 minutos. Posteriormente, 1,2 mL de  $NH_4OH$  foram incorporados, de modo a atingir um pH de cerca de 10, mantendo-se a agitação por 10 minutos. A mistura foi levada ao forno a  $80^\circ C$  por 72 horas para finalização da redução. Por fim, foram procedidas as etapas de lavagem/centrifugação com água deionizada por 5 vezes, com o intuito de eliminar o excesso de PSS,  $NH_4OH$  e AA. Na Figura 1 são observadas as dispersões de GO e rGO/PSS produzidas.

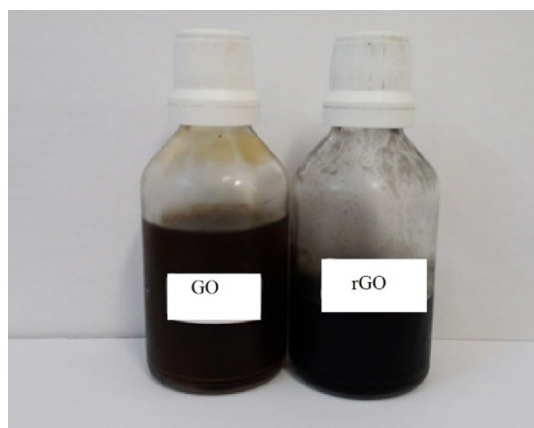

Figura 1: Dispersões GO e rGO/PSS produzidas neste trabalho.

### 2.2.2 Produção filmes

Os substratos de vidro comum (*soda-lime*), de 25,4 mm x 25,4 mm, usados para a deposição dos filmes, foram limpos com procedimento padrão, usando detergente neutro, água deionizada e acetona. Em seguida, foram atacados com solução de  $H_2O$ ,  $H_2O_2$  a 32% e  $NH_4OH$  a 29% na proporção 5:1:1 a  $80^\circ C$  por 10 minutos para hidrofilição e consequente melhoria da aderência.

Os parâmetros empregados nas deposições por *dip coating*, *spin coating* (seguindo o trabalho de GUO *et al.*, 2010 [5]) e *spray* (inspirados em NAGAVOLU *et al.* (2016) [6], ILLAKKIYA *et al.* (2016) [7] e SOLTANI-KORDSHULI *et al.* (2016) [8]) podem ser observados na Tabela 1.

Tabela 1: Parâmetros empregados nas deposições realizadas neste trabalho.

|                              | DIP COATING                                                                                          | SPIN COATING                                                                                        | SPRAY                                                                                                                                                                                                                                |
|------------------------------|------------------------------------------------------------------------------------------------------|-----------------------------------------------------------------------------------------------------|--------------------------------------------------------------------------------------------------------------------------------------------------------------------------------------------------------------------------------------|
| Equipamento                  | Marconi - MA 765                                                                                     | KW-4A, 12170 – AB, <i>SPI Supplies</i>                                                              | Aerógrafo Steula BC 66-08, bico de 0,8 mm                                                                                                                                                                                            |
| Características da deposição | - velocidade de imersão e emersão de 50 mm/min;<br>- tempo de permanência na solução de 40 segundos. | - velocidade de rotação de 2000 rpm;<br>- duração da aplicação de 60 segundos;<br>- 2 e 10 camadas. | - pressão 20 psi;<br>- distância do equipamento até o substrato 20 cm;<br>- temperatura do substrato $90^\circ C$ ;<br>- tempo de deposição 1 s;<br>- tempo entre deposições 30 s;<br>- número de camadas variável de 1, 5, 10 e 15. |
| Tempo total                  | 15 min                                                                                               | 10 min                                                                                              | 30 s – 7 min                                                                                                                                                                                                                         |
| Concentração GO e rGO/PSS    | 1,0 mg/mL<br>2,0 mg/mL                                                                               | 2,0 mg/mL                                                                                           | 1,0 mg/mL                                                                                                                                                                                                                            |

Após as deposições, as camadas de GO foram submetidas a tratamento térmico de 300°C, conforme demonstrado por WANG *et al.* (2011) [9], ao ar em forno tubular Carbolite Gero durante 5 minutos para promover a redução, gerando o óxido de grafeno reduzido termicamente (*thermally reduced graphene oxide* rGO). Os filmes de rGO/PSS foram aquecidos a 110°C em uma placa quente durante 30 minutos, para melhoria da aderência.

### 2.2.3 Caracterizações

As amostras de GO e rGO/PSS foram caracterizadas por diversas técnicas. A análise de difração de raios X (DRX) foi realizada no equipamento X'Pert pro MPD PANalytical, fonte Cu K $\alpha$ , tensão 45 kV e corrente de 40mA. A espectroscopia Raman foi estudada pelo emprego do espectrômetro NT-MDT NTEGRA, com laser com comprimento de onda de 473 nm e tempo de radiação de 100 segundos. A espectroscopia de fotoelétrons de raios X (XPS) foi realizada com o auxílio do equipamento SPECS 100, utilizando a fonte de radiação dupla de Al-K $\alpha$ , detector 2-DLine e varredura com energia inicial de 1280 eV até 20 eV. Também foram utilizados um microscópio óptico (MO) metalográfico OLYMPUS BX53MLFBD e um microscópio eletrônico de varredura (MEV) QUANTA FEG, marca FEI, com tensão de 20 kV, *spot size* 5 e distância de trabalho de aproximadamente 10 mm. Os substratos usados para a produção de amostras a serem observadas no MO e no MEV foram SiO<sub>2</sub> (300 nm)/Si e Si (silício), respectivamente.

Os filmes obtidos pelas técnicas supracitadas foram caracterizados por um perfilômetro de contato Bruker DektakXT; MEV QUANTA FEG, FEI com tensão de 5 kV, *spot size* 4 e distância de trabalho de aproximadamente 10 mm; as transmitâncias foram estudadas por meio do espectrofotômetro CARY 5000, da fabricante VARIAN, para comprimentos de onda de 400 nm até 800 nm e as resistividades medidas pelo emprego do equipamento Hall HL 5500, da fabricante BIO-RAD.

## 3. RESULTADOS E DISCUSSÃO

### 3.1 Caracterizações do GO e do rGO

Os difratogramas das amostras de grafite, GO e rGO/PSS são observados na Figura 2. O grafite apresenta um pico correspondente ao plano (002) em  $2\theta$  igual a 26° (Figura 2.a). Observa-se na curva correspondente ao GO, um deslocamento do pico referente ao plano (002), para  $2\theta$  igual a 10,05° (Figura 2.b). Esse deslocamento está associado a um aumento da distância interplanar em relação à estrutura do grafite, causado pela presença de grupos funcionais de oxigênio, segundo PRUNA *et al.* [10]. Na curva correspondente ao rGO/PSS, não se observa pico de difração presente, o que pode ser associado ao processo de esfoliação completo devido às etapas de lavagem/centrifugação após a redução, resultando em folhas de rGO majoritariamente constituídas de monocamadas ou com poucas camadas de grafeno, e, conseqüentemente, a ausência de um pico de difração de raios X.

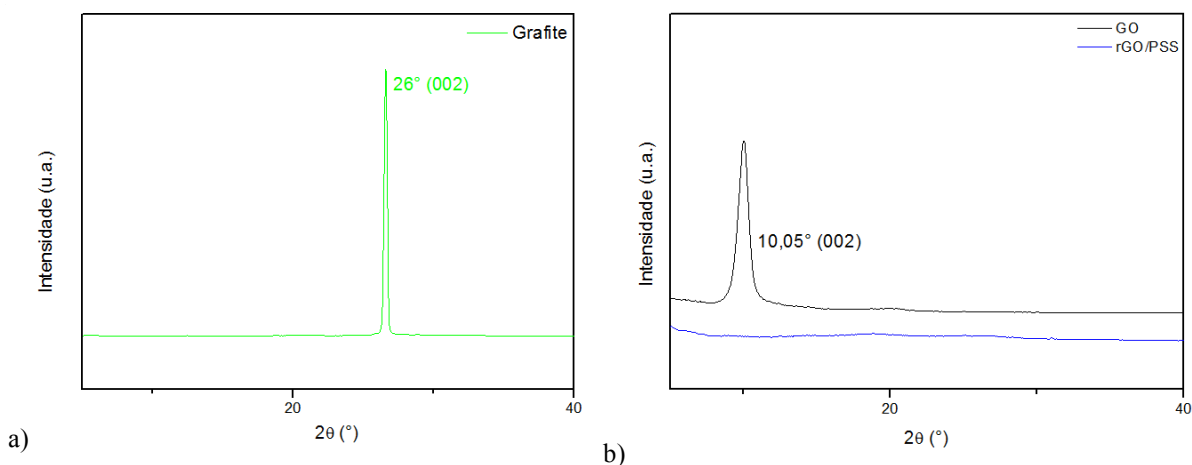

**Figura 2:** Difratogramas de amostras de a) grafite e b) GO e rGO/PSS produzidas neste trabalho.

Os espectros de Raman obtidos para as amostras de GO e rGO/PSS são observados na Figura 3. Nota-se a ocorrência da banda D em 1355  $\text{cm}^{-1}$  e da banda G em 1590  $\text{cm}^{-1}$  para GO e rGO/PSS, respectivamente. A banda G do espectro está associada a carbono grafítico e é uma das bandas que caracteriza a estrutura do

grafeno. A banda D está associada a defeitos estruturais ou domínios grafíticos parcialmente desordenados [6]. Observa-se que a banda D é bastante intensa, se comparada a grafeno puro [11], confirmando os defeitos de rede no plano basal do grafeno, gerados pela produção por via química. As razões entre as intensidades das bandas D e G ( $I_D/I_G$ ) foram determinadas como sendo 0,90 e 0,92 para o GO e rGO/PSS, o que está próximo do encontrado por CHEN *et al.* [12] e DIMIEV *et al.* [13]. A razão ( $I_D/I_G$ ) é um pouco superior no rGO/PSS em relação ao GO, o que pode ser explicado pelo aparecimento de novos domínios  $sp^2$  no rGO/PSS, conforme STANKOVICH *et al.* [14].

A Figura 4 apresenta as análises de espectroscopia de fotoelétrons de raios X (XPS) para as amostras de GO e rGO/PSS. Nota-se o aparecimento dos picos referentes a C e O na amostra de GO e de C, O e Na amostra referente ao rGO/PSS. Observa-se uma diminuição da porcentagem atômica de oxigênio na amostra rGO/PSS, indicando que a redução pelo procedimento químico foi efetiva. O aparecimento de sódio no mesmo material está relacionado ao polímero empregado na redução. Os resultados são consistentes com referências anteriores, como ROURKE *et al.* [1].

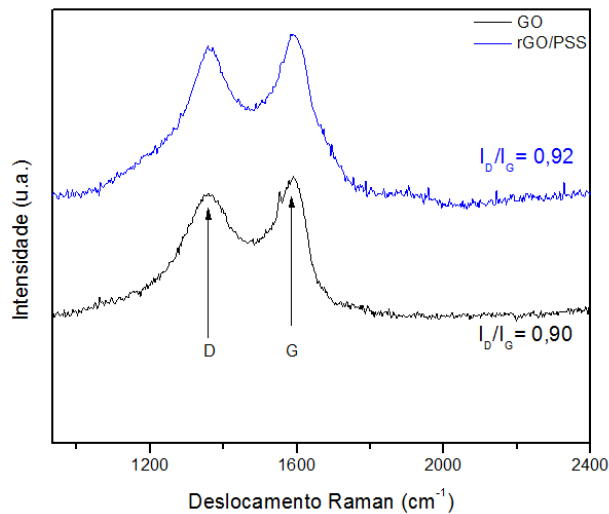

**Figura 3:** Espectros Raman de amostras de GO e rGO/PSS produzidas neste trabalho.

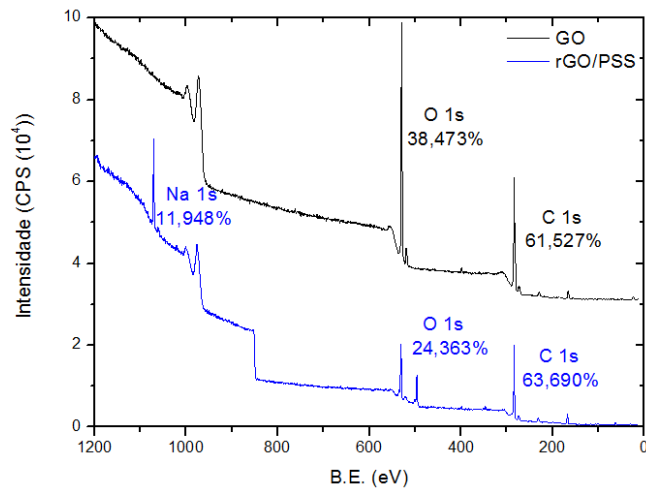

**Figura 4:** XPS de amostras de GO e rGO/PSS produzidas neste trabalho.

As microscopias ópticas foram realizadas para observação de imagens das folhas de grafeno nas amostras de GO e rGO/PSS. A Figura 5 exibe as imagens com aumento de 50x. Em todas as análises, é possível observar a presença das folhas de grafeno em tamanhos e formas diversificadas. A coloração amarela na amostra de rGO/PSS é resultante da presença do polímero PSS envolvendo as folhas de rGO (Figura 5.b).

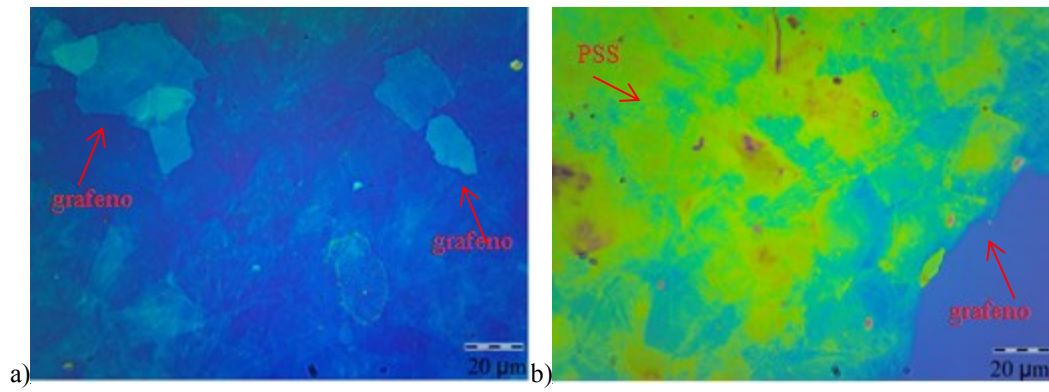

**Figura 5:** Microscopias ópticas das amostras produzidas neste trabalho: a) GO e b) rGO/PSS.

A Figura 6 apresenta os resultados obtidos pela análise de microscopia eletrônica de varredura para as amostras GO e rGO/PSS. Na Figura 6.a é possível observar as folhas de grafeno com 500x de aumento e verificar a presença de tamanhos superiores a 100 µm. As imagens b) e c) representam as folhas de grafeno observadas na amostra rGO/PSS, sendo a primeira com aumento de 1000x e a segunda com aumento de 5000x. Observa-se uma diminuição de tamanho de folhas do GO para o rGO/PSS, conforme Figuras 6.a e 6.b. Tal fato, pode estar associado ao processamento de redução, que envolveu etapas de lavagem/centrifugação, contribuindo para o processo de esfoliação do grafeno. Na Figura 6.c nota-se a presença de dobras nas folhas, indicadas pelas setas, demonstrando a flexibilidade do material.

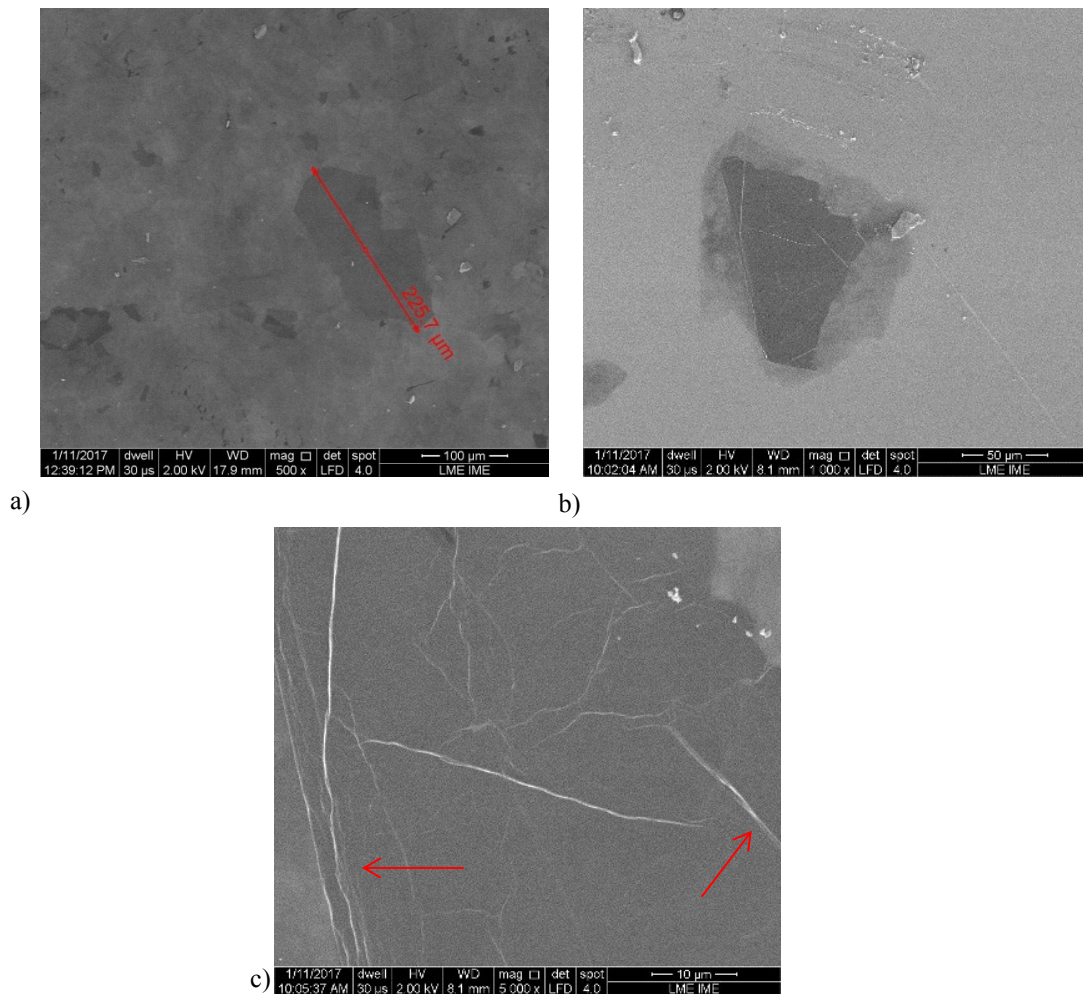

**Figura 6:** Micrografias obtidas em MEV das amostras produzidas neste trabalho a) GO 1000x; b) rGO/PSS 1000x e c) rGO/PSS 5000x.

### 3.2 Caracterizações dos filmes

A Figura 7 exibe os valores obtidos pela perfilometria de contato para as espessuras dos filmes estudados, sendo DC (*dip coating*), SC (*spin coating*) e S (*spray*). De forma geral, para todos os métodos empregados, foram observadas maiores espessuras dos filmes de trGO em comparação aos de rGO/PSS. Isso pode ser explicado pela maior aderência das folhas de GO (que após a deposição são reduzidas termicamente, originando o trGO) nos substratos, em virtude do seu caráter anfifílico (KIM *et al.*[15]), enquanto o rGO/PSS apresenta um caráter hidrofílico, em razão da presença do PSS. Apesar de o processo de hidrofiliação ter sido realizado para melhorar o caráter hidrofílico nos substratos, não há uma completa conversão do substrato para este tipo caráter, conforme observado por CRASS *et al.* [16].

Nos filmes produzidos por *dip coating*, observa-se uma maior variação de espessura da amostra DC rGO 2,0 mg/ml, devido ao acúmulo do material em regiões específicas, concomitantemente com a falta de recobrimento em outras regiões, em função da diferença entre os caracteres do substrato e das folhas de rGO/PSS. Contudo, a amostra de DC trGO 2,0 mg/ml não mostrou acúmulo de material mas sim uma maior homogeneidade de recobrimento.

Amostras obtidas por *spray* apresentaram filmes com espessuras inferiores a 100 nm, indicadas para aplicação como filme transparente e condutor [4]. Para a deposição por *spray*, constata-se que as medidas de espessura apresentaram variações menores em relação ao *dip* ou *spin coating*, tanto para os filmes de trGO como para rGO/PSS.

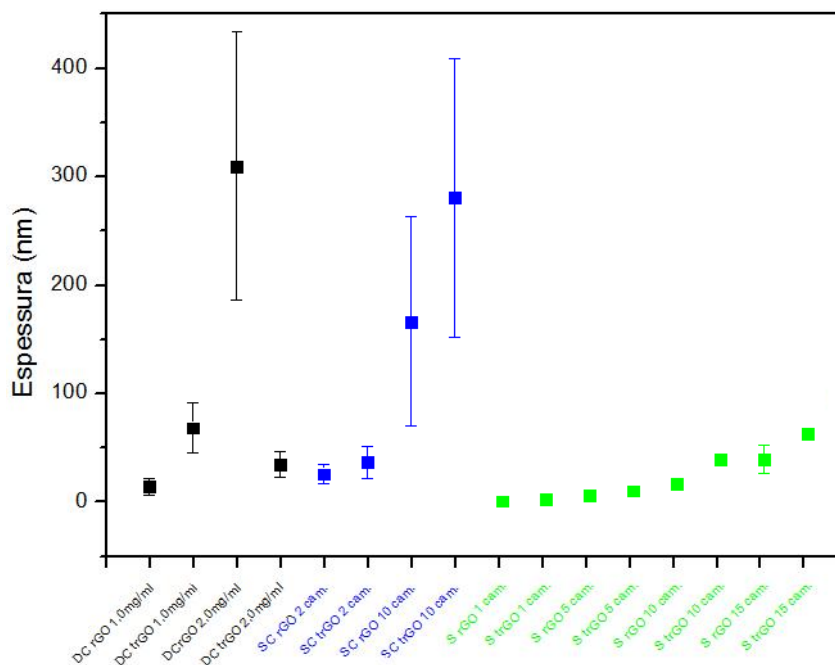

Figura 7: Espessuras dos filmes estudados.

A Figura 8 exibe algumas micrografias obtidas no MEV com magnitude de 1000x, dos filmes de trGO e rGO/PSS. Nas imagens é possível observar as folhas de grafeno recobrendo os substratos. As técnicas de *dip coating* e *spray* se mostraram as mais eficazes na produção de camadas uniformes e convenientes para a aplicação desejada. Destacam-se as amostras de *spray* produzidas com 5 e 10 camadas (cam.) e as obtidas por *dip coating* com concentração de 1,0 mg/mL, que apesar do depósito de uma quantidade pequena de material, apresentaram-se regulares em toda as suas extensões. As amostras obtidas pela técnica de *spin coating* apresentaram diversas regiões sem recobrimento, indicando que o método não é o ideal para a produção de filmes finos contínuos para aplicação como contato condutor e transparente. É importante frisar que esses resultados de deposição foram obtidos sobre vidro comum, o qual, apesar de passar por um processo de hidrofiliação, conforme já observado anteriormente, pode não apresentar um caráter totalmente hidrofílico, o que diminui sua molhabilidade e, conseqüentemente, aderência das folhas de GO e rGO/PSS. O substrato ideal deveria ter um caráter hidrofílico, de modo a permitir uma completa cobertura pelas folhas de GO ou rGO/PSS. Contudo, foi utilizado vidro comum como substrato, em função de este ser o mais utilizado nas aplicações de contatos transparentes e condutores.

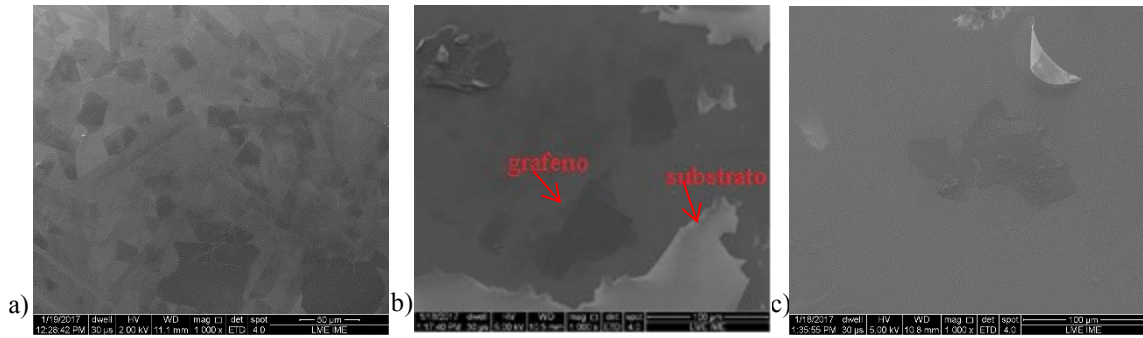

**Figura 8:** Micrografia obtida em MEV dos filmes produzidos neste trabalho: a) *dip coating* rGO/PSS 1mg/mL; b) *spin coating* rGO 10 camadas e c) *spray* trGO 5 camadas.

A Figura 9 exibe os resultados de transmitância das amostras estudadas. Observa-se que todas as amostras de *spin coating*, *dip coating* com 1 mg/mL e *spray* até 5 camadas apresentaram transmitâncias dentro da faixa de interesse, i.e., de 60% a 100%.

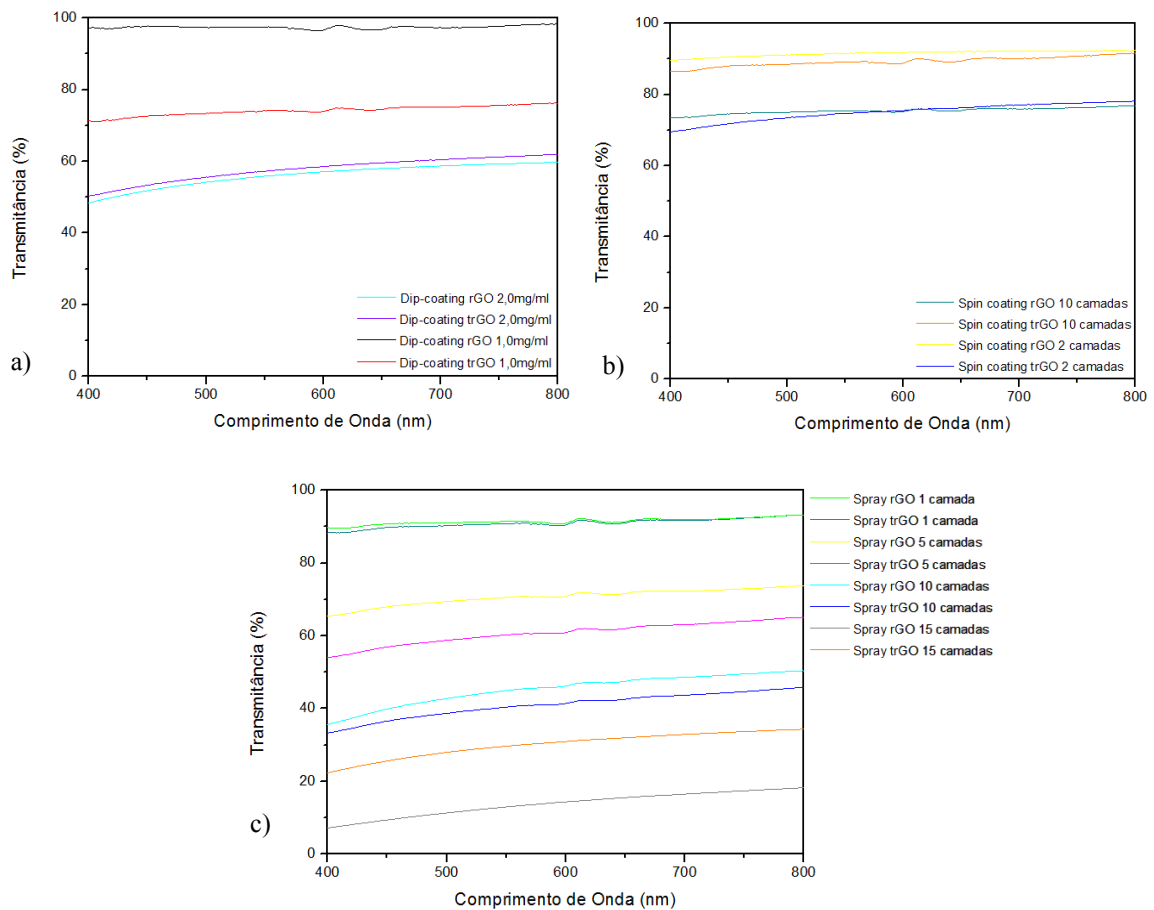

**Figura 9:** Transmitâncias dos filmes obtidos por a) *dip coating*; b) *spin coating* e c) *spray*.

A Figura 10 apresenta os valores obtidos para as medidas de resistência de folha *versus* transmitância em 550 nm, para os filmes mais representativos. Observa-se que as amostras obtidas por *dip coating* com concentração de 1,0 mg/mL e *spin coating* com 10 camadas, apesar de alta transmitância, apresentam resistência de folha muito superior ao indicado para a aplicação, provavelmente devido a regiões do substrato não recobertas pelo material. As amostras produzidas por *spray* de 5 até 15 camadas são as consideradas mais promissoras.



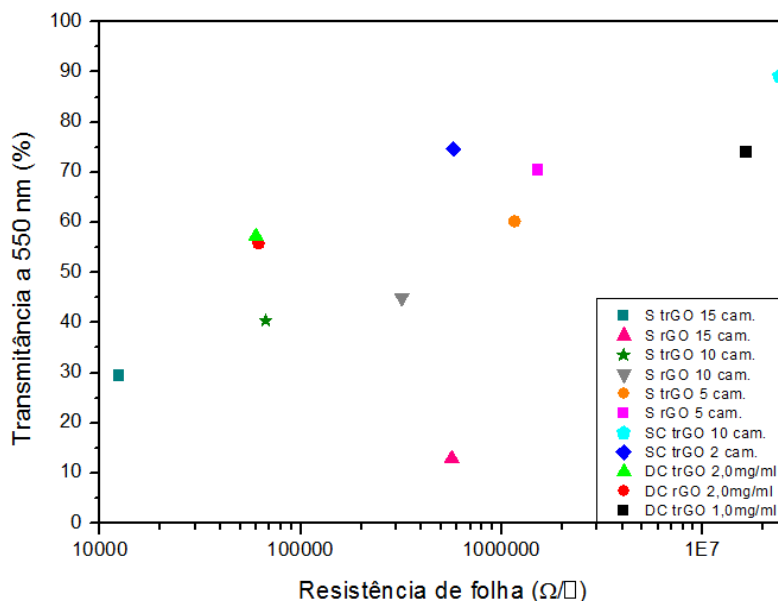

**Figura 10:** Resistência de folha versus transmitância das amostras produzidas neste trabalho.

Nas caracterizações dos filmes, observa-se que todos apresentam espessuras nanométricas, indicadas para a aplicação como contatos transparentes e condutores. As microscopias eletrônicas de varredura apontam que algumas técnicas foram capazes de produzir filmes uniformes e com folhas de grafeno recobrendo todo o substrato. As amostras produzidas por *spin coating*, *dip coating* com concentração de 1 mg/mL e *spray* de 1 e 5 camadas, demonstraram-se suficientemente transparentes para serem aplicadas como filmes condutores e transparentes. A resistividade elétrica ainda apresenta valores elevados para tal aplicação, mas adaptações nos parâmetros da deposição de filmes por *spray* são capazes de reverter este quadro. PARK *et al.* [17] apresentaram a produção de filmes de rGO por *spray* com transmitâncias de 88% e resistência de folha de 12,5 kΩ/□, um valor que é muito próximo em relação ao valor mínimo obtido nesse trabalho (12,3 kΩ/□) para o filme de trGO com 15 camadas depositado por *spray*, indicando a viabilidade do método de deposição.

#### 4. CONCLUSÕES

Conclui-se que o método mais promissor para a aplicação de grafeno como filmes condutores e transparentes é o *spray*, por conta de sua facilidade, rapidez, eficiência e possibilidade de variação nos parâmetros do processo. Dos filmes testados, o *spray* rGO/PSS com 5 camadas apresentou melhores condições para a aplicação desejada. Para fins de otimização das propriedades de resistividade e transparência, visando a aplicação em contatos transparentes e condutores, são necessárias novas variações dos parâmetros de deposição e de tratamento térmico. A aplicação é viável e expõe uma série de vantagens, pois as folhas de grafeno são flexíveis, apresentam produção simples, são menos custosas comparadas ao material tradicional e não tóxicas.

#### 5. AGRADECIMENTOS

Os autores agradecem ao Laboratório de Tecnologia do Hidrogênio (UFRJ), ao Laboratório de Revestimentos Protetores e Materiais Nanoestruturados (PUC-RJ) e ao Laboratório Multiusuário de Nanociência e Nanotecnologia (LabNANO - CBPF) pela contribuição nas análises, à Coordenação de Aperfeiçoamento de Pessoal de Nível Superior CAPES e à Fundação de Amparo à Pesquisa do Estado do Rio de Janeiro (FAPERJ) pelo apoio financeiro.

#### 6. BIBLIOGRAFIA

- [1] ROURKE, J., PANDEY, P., MOORE, J., *et al.*, "The real graphene oxide revealed - stripping the oxidative debris from the graphene-like sheets", *Angewandte Chemie International Edition*, v. 50, n. 14, pp. 3173–3177, Feb. 2011.
- [2] FERNÁNDEZ-MERINO, M., GUARDIA, L., PAREDES, J., *et al.*, "Vitamin C Is an Ideal Substitute for Hydrazine in the Reduction of Graphene Oxide Suspensions", *Journal of Physical Chemistry C*, v. 114, pp. 6426–6432, Apr. 2010.

- [3] BONACCORSO, F., LOMBARDO, A., HASAN, T., *et al.*, “Production and processing of graphene and 2d crystals”, *Materials Today*, v. 15, pp. 564-585, Dec. 2012.
- [4] ZHENG, Q., GUDARZI, M., WANG, S., *et al.*, “Improved electrical and optical characteristics of transparent graphene thin films produced by acid and doping treatments”, *Carbon*, v. 49, pp. 2905-2916, Mar. 2011.
- [5] GUO, Y., DI, C., LIU, H., *et al.*, “General route toward patterning of graphene oxide by a combination of wettability modulation and spin-coating”, *ACS Nano*, v. 4, n. 10, pp. 5749-5754, Sep. 2010.
- [6] NAGAVOLU, C., SUSHIMATHA, K., RAGHAVENDER, M., *et al.*, “Pt-free spray coated reduced graphene oxide counter electrodes for dye sensitized solar cells”, *Solar Energy*, v. 137, pp. 143-147, Aug. 2016.
- [7] ILLAKKIYA, J., RAJALAKSHMI, P., OOMMEN, R. “Nebulized spray pyrolysis: a new method for synthesis of graphene film and their characteristics”, *Surface & Coatings Technology*, v. 307, pp. 65-72, Aug. 2016.
- [8] SOLTANI-KORDSHULI, F., ZABIHI, F., ESLAMIAN, M. “Graphene-doped PEDOT:PSS nanocomposite thin films fabricated by conventional and substrate vibration-assisted spray coating (SVASC)”, *Engineering Science and Technology, an International Journal*, v. 19, pp. 1216-1223, Mar. 2016.
- [9] WANG, S., GENG, Y., ZHENG, Q., *et al.*, “Fabrication of highly conducting and transparent graphene films”, *Carbon*, v. 48, pp. 1815-1823, Jan. 2010.
- [10] PRUNA, A., PULLINI, D., BUSQUETS, D. “Influence of synthesis conditions on properties of green-reduced graphene oxide”, *Journal of Nanoparticle Research*, v. 15, n. 5, pp. 1-11, Apr. 2013.
- [11] ZHANG, D., ZHAN, Z. “Strengthening effect of graphene derivatives in copper matrix composites”, *Journal of Alloys and Compounds*, v. 654, pp. 226-233, Set. 2015.
- [12] CHEN, J., YAO, B., LI, C., *et al.*, “An improved Hummers method for eco-friendly synthesis of graphene oxide”, *Carbon*, v. 64, pp. 225-259, Jul. 2013.
- [13] DIMIEV, A., TOUR, J. “Mechanism of graphene oxide formation”, *ACS Nano*, v. 8, n. 3, pp. 3060-3068, Feb. 2014.
- [14] STANKOVICH, S., DIKIN, D., PINER, R., *et al.*, “Synthesis of graphene-based nanosheets via chemical reduction of exfoliated graphite oxide”, *Carbon*, v. 45, pp. 1558-1565, Feb. 2007.
- [15] KIM, J., COTE, J., KIM, F., *et al.*, “Graphene Oxide Sheets at Interfaces”, *Journal of the American Chemical Society*, v. 132, pp. 8180–8186, May. 2010.
- [16] CRASS, J., ROWE-TAITT, C., NIVENS, D., *et al.*, “Comparison of chemical cleaning methods of glass in preparation for silanization”, *Biosensors & Bioelectronics*, v. 14, pp. 683-688, Sep. 1999.
- [17] PARK, Y., CHOI, K., KIM, S. “Graphene oxide/PEDOT:PSS and reduced graphene oxide/PEDOT:PSS hole extraction layers in organic photovoltaic cells”, *Physica Status Solidi A*, v. 209, n. 7, pp. 1363-1368, Apr. 2012.
